# Supplementary material
Source: PubMed Central journal article supplement (PMC6225541)
Supplement: jnm207431SupplementalData.pdf [file jnm207431SupplementalData.pdf]

**Supplemental Table 1. Bone marrow and muscle fractional masses of volumes of interest and whole organ reference masses.**

|           | Mean Fractional Mass (g) |        | Reference Organ Mass (g) |         |
|-----------|--------------------------|--------|--------------------------|---------|
|           | Bone Marrow              | Muscle | Bone Marrow              | Muscle  |
| Subject 1 | 1.77                     | 6.70   | 1300*                    | 17000** |
| Subject 2 | 1.71                     | 6.72   | 1300*                    | 17000** |
| Subject 3 | 1.84                     | 6.70   | 1120*                    | 28000** |
| Subject 4 | 1.73                     | 6.62   | 1120*                    | 28000** |
| Subject 5 | 1.67                     | 6.49   | 1300*                    | 17000** |
| Subject 6 | 1.80                     | 6.60   | 1120*                    | 28000** |

\*Hadid L, Gardumi A, Desbree A. Evaluation of absorbed and effective doses to subjects from radiopharmaceuticals using the ICRP 110 reference computational phantoms and ICRP 103 formulation. *Radiat Prot Dosimetry*. 2013;156:141-159.

\*\*ICRP. ICRP publication 60. Recommendations of the international commission on radiological protection. *Ann ICRP*. 1990;21:1-227.

**Supplemental Table 2. Time-integrated Activity Coefficients in hours for all subjects.**

|                          | M1    | M2    | M3    | Mean ± SD<br>(males) | F1    | F2    | F3    | Mean ± SD<br>(females) |
|--------------------------|-------|-------|-------|----------------------|-------|-------|-------|------------------------|
| <b>Brain</b>             | 0.35  | 0.20  | 0.15  | 0.23 ± 0.11          | 0.50  | 0.30  | 0.16  | 0.32 ± 0.17            |
| <b>Lungs</b>             | 2.08  | 0.90  | 0.83  | 1.27 ± 0.70          | 3.37  | 1.71  | 0.99  | 2.02 ± 1.22            |
| <b>Spleen</b>            | 0.27  | 0.19  | 0.22  | 0.23 ± 0.04          | 0.15  | 0.61  | 0.17  | 0.31 ± 0.26            |
| <b>Kidneys</b>           | 0.37  | 0.29  | 0.32  | 0.32 ± 0.04          | 0.37  | 0.62  | 0.35  | 0.45 ± 0.15            |
| <b>Gallbladder</b>       | NA    | 0.10  | 0.06  | 0.08 ± 0.03          | 0.02  | NA    | 0.11  | 0.07 ± 0.07            |
| <b>Liver</b>             | 5.90  | 4.40  | 3.42  | 4.57 ± 1.25          | 4.97  | 3.92  | 12.00 | 6.96 ± 4.39            |
| <b>Heart Wall</b>        | 0.54  | 0.32  | 0.29  | 0.38 ± 0.14          | 0.47  | 0.69  | 0.23  | 0.46 ± 0.23            |
| <b>Bladder</b>           | 0.84  | 0.45  | 0.60  | 0.63 ± 0.20          | 1.01  | 0.60  | 0.93  | 0.85 ± 0.21            |
| <b>Pancreas</b>          | 0.10  | 0.05  | 0.08  | 0.08 ± 0.03          | 0.13  | 0.15  | 0.05  | 0.11 ± 0.05            |
| <b>Red Marrow</b>        | 3.05  | 2.03  | 3.76  | 2.95 ± 0.87          | 4.77  | 4.76  | 3.83  | 4.45 ± 0.54            |
| <b>Adrenal Glands</b>    | 0.02  | 0.01  | 0.00  | 0.01 ± 0.01          | 0.02  | 0.02  | 0.01  | 0.01 ± 0.01            |
| <b>Small Intestine</b>   | 0.92  | 1.66  | 2.03  | 1.54 ± 0.56          | 0.67  | 1.57  | 1.33  | 1.19 ± 0.46            |
| <b>Breasts</b>           | NA    | NA    | NA    | NA                   | 0.26  | 0.17  | 0.16  | 0.19 ± 0.05            |
| <b>Testes</b>            | 0.05  | 0.03  | 0.02  | 0.03 ± 0.02          | NA    | NA    | NA    | NA                     |
| <b>Thyroid</b>           | 0.09  | 0.04  | 0.03  | 0.05 ± 0.03          | 0.05  | 0.02  | NA    | 0.04 ± 0.02            |
| <b>Large Intestine</b>   | 2.68  | 1.64  | 2.21  | 2.18 ± 0.52          | 0.64  | 0.81  | 2.38  | 1.28 ± 0.96            |
| <b>Thymus</b>            | 0.02  | 0.02  | 0.02  | 0.02 ± 0.00          | 0.03  | 0.01  | 0.01  | 0.02 ± 0.01            |
| <b>Muscle</b>            | 18.49 | 22.03 | 15.16 | 18.56 ± 3.44         | 11.79 | 15.66 | 8.01  | 11.82 ± 3.83           |
| <b>Stomach Wall</b>      | 0.66  | 0.28  | 0.25  | 0.40 ± 0.23          | 0.02  | 0.40  | 0.25  | 0.22 ± 0.19            |
| <b>Uterus</b>            | NA    | NA    | NA    | NA                   | 0.10  | 0.07  | 0.08  | 0.08 ± 0.02            |
| <b>Ovaries</b>           | NA    | NA    | NA    | NA                   | 0.01  | 0.03  | 0.01  | 0.01 ± 0.01            |
| <b>Whole Body</b>        | 56.03 | 47.80 | 42.20 | 48.68 ± 6.96         | 78.05 | 86.49 | 48.51 | 71.01 ± 19.94          |
| <b>Remainder of Body</b> | 19.61 | 13.17 | 12.75 | 15.17 ± 3.84         | 48.70 | 54.37 | 17.47 | 40.18 ± 19.87          |

M1-M3: Male subjects; F1-F3: Female subjects; SD = standard deviation; NA = not available

**Supplemental Table 3. Absorbed dose estimates (mGy/MBq) for all subjects.**

|                                    | <b>M1</b> | <b>M2</b> | <b>M3</b> | <b>F1</b> | <b>F2</b> | <b>F3</b> | <b>Mean ± SD</b> |
|------------------------------------|-----------|-----------|-----------|-----------|-----------|-----------|------------------|
| <b>Adrenals</b>                    | 0.437     | 0.304     | 0.223     | 0.587     | 0.567     | 0.391     | 0.418 ± 0.143    |
| <b>Brain</b>                       | 0.107     | 0.073     | 0.064     | 0.213     | 0.192     | 0.085     | 0.122 ± 0.064    |
| <b>Breasts</b>                     | 0.153     | 0.115     | 0.104     | 0.287     | 0.253     | 0.176     | 0.181 ± 0.074    |
| <b>Gallbladder Wall</b>            | 0.360     | 0.416     | 0.336     | 0.516     | 0.557     | 0.694     | 0.480 ± 0.136    |
| <b>Lower large intestinal wall</b> | 0.827     | 0.572     | 0.689     | 0.616     | 0.723     | 0.824     | 0.709 ± 0.105    |
| <b>Small Intestine</b>             | 0.445     | 0.503     | 0.562     | 0.553     | 0.790     | 0.572     | 0.571 ± 0.117    |
| <b>Stomach Wall</b>                | 0.439     | 0.279     | 0.252     | 0.420     | 0.623     | 0.352     | 0.394 ± 0.134    |
| <b>Upper large intestinal wall</b> | 0.755     | 0.549     | 0.648     | 0.595     | 0.721     | 0.820     | 0.681 ± 0.102    |
| <b>Heart Wall</b>                  | 0.454     | 0.305     | 0.274     | 0.636     | 0.786     | 0.375     | 0.472 ± 0.201    |
| <b>Kidneys</b>                     | 0.393     | 0.321     | 0.325     | 0.507     | 0.690     | 0.454     | 0.448 ± 0.139    |
| <b>Liver</b>                       | 0.793     | 0.605     | 0.484     | 0.950     | 0.822     | 1.890     | 0.924 ± 0.501    |
| <b>Lungs</b>                       | 0.459     | 0.263     | 0.235     | 0.882     | 0.605     | 0.377     | 0.470 ± 0.243    |
| <b>Muscle</b>                      | 0.239     | 0.234     | 0.188     | 0.357     | 0.416     | 0.221     | 0.276 ± 0.090    |
| <b>Ovaries</b>                     | NA        | NA        | NA        | 0.477     | 0.732     | 0.385     | 0.409 ± 0.177    |
| <b>Pancreas</b>                    | 0.413     | 0.289     | 0.301     | 0.584     | 0.669     | 0.397     | 0.442 ± 0.154    |
| <b>Red Marrow</b>                  | 0.367     | 0.277     | 0.363     | 0.612     | 0.653     | 0.406     | 0.446 ± 0.151    |
| <b>Osteogenic Cells</b>            | 0.337     | 0.257     | 0.297     | 0.755     | 0.816     | 0.423     | 0.481 ± 0.243    |
| <b>Skin</b>                        | 0.131     | 0.109     | 0.096     | 0.283     | 0.316     | 0.138     | 0.179 ± 0.095    |
| <b>Spleen</b>                      | 0.409     | 0.312     | 0.316     | 0.433     | 0.955     | 0.351     | 0.463 ± 0.246    |
| <b>Testes</b>                      | 0.290     | 0.212     | 0.153     | NA        | NA        | NA        | 0.218 ± 0.069    |
| <b>Thymus</b>                      | 0.291     | 0.234     | 0.226     | 0.503     | 0.371     | 0.244     | 0.312 ± 0.108    |
| <b>Thyroid</b>                     | 0.696     | 0.384     | 0.313     | 0.643     | 0.439     | 0.155     | 0.438 ± 0.204    |
| <b>Urinary Bladder Wall</b>        | 0.564     | 0.373     | 0.421     | 0.908     | 0.709     | 0.734     | 0.618 ± 0.204    |
| <b>Uterus</b>                      | NA        | NA        | NA        | 0.529     | 0.512     | 0.393     | 0.367 ± 0.131    |
| <b>Total Body</b>                  | 0.254     | 0.219     | 0.193     | 0.448     | 0.494     | 0.281     | 0.315 ± 0.125    |
| <b>Effective Dose (mSv/MBq)</b>    | 0.448     | 0.304     | 0.325     | 0.573     | 0.618     | 0.485     | 0.459 ± 0.127    |

M1-M3: Male subjects; F1-F3: Female subjects; SD = standard deviation; NA = not available

**Supplemental Table 4. Plasma protein binding expressed as % free radiotracer.**

|                           | <b>30 min</b> | <b>60 min</b> |
|---------------------------|---------------|---------------|
| <b>M1</b>                 | 29.7          | 29.9          |
| <b>M2</b>                 | 0.9           | 1.6           |
| <b>M3</b>                 | 28.4          | 27.5          |
| <b>Mean ± SD (male)*</b>  | 29.1 ± 0.9    | 28.7 ± 1.7    |
| <b>F1</b>                 | 29.9          | 24.9          |
| <b>F2</b>                 | 38            | 42.8          |
| <b>F3</b>                 | 33.6          | 27.5          |
| <b>Mean ± SD (female)</b> | 33.8 ± 4.1    | 31.7 ± 9.7    |

M1-M3: Male subjects; F1-F3: Female subjects; SD = standard deviation

\*M2 was excluded [plasma protein binding 7.93 SD lower than the mean for the remaining five subjects].
